# Supplementary material for: Prevalence and distribution pattern of mood swings in Thai adolescents: a school-based survey in the central region of Thailand
Source: PubMed Central journal article supplement (PMC7189499; doi:10.1186/s12888-020-02605-0), 2020-04-29
Supplement: 12888_2020_2605_MOESM1_ESM.pdf [file 12888_2020_2605_MOESM1_ESM.pdf]

Table 1 Number and percentage of participants on personal and contextual determinants

| Variables                                    | Total Number (%)<br>(n=2598) | Number (%) on Location of school<br>(n=2593*) |                   |                     |
|----------------------------------------------|------------------------------|-----------------------------------------------|-------------------|---------------------|
|                                              |                              | Bangkok<br>(n=561)                            | Urban<br>(n=1095) | Suburban<br>(n=937) |
| <b>Sex</b>                                   |                              |                                               |                   |                     |
| Male                                         | 884(34.0)                    | 292(52.0)                                     | 389(35.5)         | 203(21.7)           |
| Female                                       | 1549(59.6)                   | 238(42.4)                                     | 626(57.2)         | 680(72.6)           |
| Creative gender                              | 165(6.4)                     | 31(5.5)                                       | 80(7.3)           | 54(5.7)             |
| <b>Age (years)</b>                           |                              |                                               |                   |                     |
| 15 – 16                                      | 1000(38.5)                   | 198(35.3)                                     | 461(42.1)         | 338(36.1)           |
| 17 – 18                                      | 1517(58.4)                   | 354(63.1)                                     | 577(52.7)         | 586(62.5)           |
| ≥19                                          | 81(3.1)                      | 9(1.6)                                        | 57(5.2)           | 13(1.4)             |
| <b>Family history of mental problems</b>     |                              |                                               |                   |                     |
| No                                           | 1991(76.6)                   | 418(74.5)                                     | 821(75.0)         | 748(79.8)           |
| Yes                                          | 226(8.7)                     | 53(9.4)                                       | 115(10.5)         | 58(6.1)             |
| - father/mother/sibling                      | 136(5.2)                     | 34(6.1)                                       | 69(6.3)           | 33(3.5)             |
| - grandparents/uncle/aunt                    | 77(3.0)                      | 18(3.2)                                       | 37(3.4)           | 22(2.3)             |
| - cousin                                     | 13(0.5)                      | 1(0.2)                                        | 9(0.8)            | 3(0.3)              |
| Uncertain/Unknown                            | 381(14.7)                    | 90(16.0)                                      | 159(14.5)         | 131(14.0)           |
| <b>Mood Swings (MS)</b>                      |                              |                                               |                   |                     |
| Mood swings<br>(AD>5&DE>9&A>5)               | 686 (26.4)                   | 182(32.4)                                     | 296(27.0)         | 206(22.0)           |
| - Anxiety/Depression (AD)<br>(Above norm=>5) | 255(48.3)                    | 315(56.1)                                     | 516(47.1)         | 420(44.8)           |
| - Depression/Elation (DE)<br>(Above norm=>9) | 1210 (46.6)                  | 302(53.8)                                     | 484(44.2)         | 422(38.5)           |
| - Anger (A)<br>(Above norm=>5)               | 1062(40.9)                   | 256(45.6)                                     | 455(41.6)         | 349(37.2)           |
| <b>Bullying (IBS)</b>                        |                              |                                               |                   |                     |
| Bullying involvement<br>(Above norm=>13)     | 1293(49.8)                   | 308(54.9)                                     | 555(50.7)         | 427(45.6)           |
| - Bully behavior<br>(Above norm=>6)          | 1285(49.5)                   | 315(56.1)                                     | 542(49.5)         | 425(45.4)           |
| - Fight behavior<br>(Above norm=>3)          | 1034(39.8)                   | 242(43.1)                                     | 474(43.3)         | 316(33.7)           |
| - Victim behavior<br>(Above norm=>3)         | 1279(49.2)                   | 295(52.6)                                     | 550(50.2)         | 431(46.0)           |
| <b>Social Media Use (IAT)</b>                |                              |                                               |                   |                     |
| - Normal (score < 49)                        | 1383(53.2)                   | 287(51.1)                                     | 616(56.3)         | 479(51.1)           |
| - Trend to impact<br>(score 50 - 79)         | 1088(41.9)                   | 243(43.3)                                     | 431(39.4)         | 410(43.8)           |
| - Get impact/problems<br>(score > 80)        | 127(4.9)                     | 31(5.5)                                       | 48(4.4)           | 48(5.1)             |

Table 1 Number and percentage of participants on personal and contextual determinants (cont.)

| Variables                                              | Total Number (%)<br>(n=2598) | Number (%) on Location of school<br>(n=2593*) |                   |                     |
|--------------------------------------------------------|------------------------------|-----------------------------------------------|-------------------|---------------------|
|                                                        |                              | Bangkok<br>(n=561)                            | Urban<br>(n=1095) | Suburban<br>(n=937) |
| <b>1<sup>st</sup> order reason to use social media</b> |                              |                                               |                   |                     |
| - Find someone to chat                                 | 625 (24.1)                   | 132(23.5)                                     | 260(23.7)         | 232(24.8)           |
| - Play game                                            | 665 (25.6)                   | 137(24.4)                                     | 276(25.2)         | 250(26.7)           |
| - Communicate in family                                | 552 (21.2)                   | 123(21.9)                                     | 212(19.3)         | 216(23.1)           |
| - Entertainment                                        | 828 (31.9)                   | 182(32.4)                                     | 322(29.4)         | 323(34.5)           |
| - Chat with boy/girlfriend                             | 732 (28.2)                   | 173(30.8)                                     | 291(26.6)         | 268(28.6)           |
| - Education/knowledge                                  | 390 (15.0)                   | 84(15.0)                                      | 164(15.0)         | 142(15.2)           |
| <b>Substance use in 3 months past</b>                  |                              |                                               |                   |                     |
| - Tobacco (score>2)                                    | 61 (2.3)                     | 12(2.1)                                       | 43(3.9)           | 6(0.6)              |
| - Alcohol (score>3)                                    | 387 (14.9)                   | 76(13.5)                                      | 169(15.4)         | 142(15.2)           |
| - Cannabis (score>2)                                   | 55 (2.1)                     | 8(1.4)                                        | 32(2.9)           | 15(1.6)             |
| - Stimulant (score>2)                                  | 33 (1.3)                     | 4(0.7)                                        | 18(1.6)           | 11(1.2)             |
| - Sedative (score>2)                                   | 45 (1.7)                     | 7(1.2)                                        | 26(2.4)           | 12(1.3)             |
| - Heroin (score>2)                                     | 25 (1.0)                     | 3(0.5)                                        | 13(1.2)           | 9(1.0)              |
| - Other substance**                                    | 63 (2.4)                     | 11(2.0)                                       | 32(2.9)           | 20(2.1)             |
| - Energy drinking (score>2)                            | 351 (13.5)                   | 89(15.9)                                      | 150(13.7)         | 112(12.0)           |
| <b>Family structure</b>                                |                              |                                               |                   |                     |
| - Both parents are together                            | 1632(62.8)                   | 370(66.0)                                     | 653(59.6)         | 604(64.5)           |
| - Single parent                                        | 847(32.6)                    | 160(28.5)                                     | 386(35.3)         | 301(32.1)           |
| - Father/mother remarried                              | 95(3.7)                      | 22(3.9)                                       | 44(4.0)           | 29(3.1)             |
| - Foster                                               | 24(0.9)                      | 9(1.6)                                        | 12(1.1)           | 3(0.3)              |
| <b>Family circumstance:</b>                            |                              |                                               |                   |                     |
| Expressed emotion in family (EE)                       |                              |                                               |                   |                     |
| High EE (Above norm= > 108)                            | 1256 (48.3)                  | 307(54.7)                                     | 536(48.9)         | 412(44.0)           |
| - Lack of support (LES)                                |                              |                                               |                   |                     |
| High LES (Above norm=>40)                              | 1185 (45.6)                  | 300(53.5)                                     | 510(46.6)         | 375(40.0)           |
| - Intrusive (INTR)                                     |                              |                                               |                   |                     |
| High INTR (Above norm=>18)                             | 1295 (49.2)                  | 266(47.4)                                     | 575(52.5)         | 451(48.1)           |
| - Irritation (IRR)                                     |                              |                                               |                   |                     |
| High IRR (Above norm=>15)                              | 1205 (46.4)                  | 280(49.9)                                     | 507(46.3)         | 417(44.5)           |
| - Criticism (C)                                        |                              |                                               |                   |                     |
| High C (Above norm=>11)                                | 1224 (47.1)                  | 283(50.4)                                     | 547(49.9)         | 393(41.9)           |
| - Positive Criticism (PC)                              |                              |                                               |                   |                     |
| High PC (Above norm=>24)                               | 987 (38.0)                   | 195(34.8)                                     | 406(37.1)         | 381(40.6)           |
| <b>Educational program</b>                             |                              |                                               |                   |                     |
| - High school                                          | 1382(53.2)                   | 227(40.5)                                     | 489(44.7)         | 662(70.7)           |
| - Vocational school                                    | 1216(46.8)                   | 334(59.5)                                     | 606(55.3)         | 275(29.3)           |

\* five were missing data of school variables

\*\*Other substance use groups, participated were reported, identified Pro (procodyl), B5 (benzhexol), tramadol, codeine.
