# Supplementary material for: Prevalence and distribution pattern of mood swings in Thai adolescents: a school-based survey in the central region of Thailand
Source: PubMed Central journal article supplement (PMC7189499; doi:10.1186/s12888-020-02605-0), 2020-04-29
Supplement: 12888_2020_2605_MOESM2_ESM.pdf [file 12888_2020_2605_MOESM2_ESM.pdf]

Table 2 Binary logistic regression analyses of associations between person and contextual determinants and mood swings among Thai adolescent in central region of Thailand (n = 2593)

| Variable                                             | Model 1                             |         |       | Model 2 |         |       | Model 3 |         |       | Model 4 |         |       | Model 5 |         |       |  |
|------------------------------------------------------|-------------------------------------|---------|-------|---------|---------|-------|---------|---------|-------|---------|---------|-------|---------|---------|-------|--|
|                                                      | SE                                  | P-value | OR    | SE      | P-value | OR    | SE      | P-value | OR    | SE      | P-value | OR    | SE      | P-value | OR    |  |
| Constant                                             | .082                                | .000    | .307  | .121    | .000    | .104  | .140    | .000    | .067  | .167    | .000    | .047  | .171    | .000    | .053  |  |
| <b>Personal level</b>                                |                                     |         |       |         |         |       |         |         |       |         |         |       |         |         |       |  |
| <i>Sex</i>                                           |                                     |         |       |         |         |       |         |         |       |         |         |       |         |         |       |  |
| Male <sup>Ref</sup>                                  |                                     |         |       |         |         |       |         |         |       |         |         |       |         |         |       |  |
| Female                                               | .097                                | .971    | .996  | .104    | .435    | 1.085 | .106    | .122    | 1.179 | .110    | .017    | 1.299 | .111    | .011    | 1.325 |  |
| Creative gender                                      | .192                                | .957    | 1.011 | .204    | .873    | .968  | .207    | .923    | 1.020 | .209    | .740    | 1.072 | .210    | .627    | 1.107 |  |
| <i>Family history of mental problems and illness</i> |                                     |         |       |         |         |       |         |         |       |         |         |       |         |         |       |  |
| No <sup>ref</sup>                                    |                                     |         |       |         |         |       |         |         |       |         |         |       |         |         |       |  |
| Yes                                                  | .147                                | .000    | 2.042 | .157    | .000    | 2.062 | .159    | .000    | 1.985 | .160    | .000    | 1.969 | .161    | .000    | 1.959 |  |
| Uncertain                                            | .120                                | .000    | 1.716 | .127    | .000    | 1.588 | .130    | .002    | 1.495 | .130    | .002    | 1.500 | .131    | .003    | 1.481 |  |
| <i>Bullying Involvement (base=below median)</i>      |                                     |         |       |         |         |       |         |         |       |         |         |       |         |         |       |  |
|                                                      | -2LL = 2955.34                      |         |       |         |         |       |         |         |       |         |         |       |         |         |       |  |
|                                                      | $\chi^2 = 36.88$ , df = 4, p < .001 |         |       | .101    | .000    | 2.381 | .103    | .000    | 2.273 | .103    | .000    | 2.267 | .103    | .000    | 2.281 |  |
| <i>Social media use</i>                              |                                     |         |       |         |         |       |         |         |       |         |         |       |         |         |       |  |
| Normal <sup>Ref</sup>                                | Classification accuracy = 73.6      |         |       |         |         |       |         |         |       |         |         |       |         |         |       |  |
| Trend to impact                                      | AIC = 2959.34                       |         |       | .101    | .000    | 2.394 | .103    | .000    | 2.240 | .104    | .000    | 2.272 | .104    | .000    | 2.251 |  |
| Get impact/problems                                  |                                     |         |       | .201    | .000    | 5.080 | .205    | .000    | 4.158 | .206    | .000    | 4.174 | .206    | .000    | 4.081 |  |
| <i>Substance use in past 3 months (base=No)</i>      |                                     |         |       |         |         |       |         |         |       |         |         |       |         |         |       |  |
| Tobacco                                              |                                     |         |       | .310    | .980    | 1.008 | .310    | .803    | .926  | .314    | .624    | .857  | .315    | .511    | .813  |  |
| Alcohol                                              |                                     |         |       | .136    | .772    | .961  | .138    | .513    | .914  | .140    | .455    | .901  | .140    | .504    | .911  |  |
| Energy drinking                                      |                                     |         |       | .135    | .210    | 1.185 | .138    | .209    | 1.189 | .138    | .206    | 1.191 | .138    | .224    | 1.183 |  |
| Illicit substance                                    |                                     |         |       | .236    | .017    | 1.751 | .239    | .052    | 1.593 | .240    | .045    | 1.618 | .242    | .054    | 1.592 |  |

Table 2 Binary logistic regression analyses of associations between person and contextual determinants and mood swings among Thai adolescent in central region of Thailand (cont.) (n = 2593)

| Variable                                                                     | Model 1 |         |    | Model 2                     |         |    | Model 3 |         |    | Model 4 |         |    | Model 5 |         |    |      |  |  |      |  |  |       |  |  |      |  |  |      |  |  |       |  |  |
|------------------------------------------------------------------------------|---------|---------|----|-----------------------------|---------|----|---------|---------|----|---------|---------|----|---------|---------|----|------|--|--|------|--|--|-------|--|--|------|--|--|------|--|--|-------|--|--|
|                                                                              | SE      | P-value | OR | SE                          | P-value | OR | SE      | P-value | OR | SE      | P-value | OR | SE      | P-value | OR |      |  |  |      |  |  |       |  |  |      |  |  |      |  |  |       |  |  |
| <b>Contextual level</b>                                                      |         |         |    |                             |         |    |         |         |    |         |         |    |         |         |    |      |  |  |      |  |  |       |  |  |      |  |  |      |  |  |       |  |  |
|                                                                              |         |         |    | -2LL = 2689.78              |         |    |         |         |    |         |         |    |         |         |    |      |  |  |      |  |  |       |  |  |      |  |  |      |  |  |       |  |  |
| <i>Family structure</i>                                                      |         |         |    | $\chi^2 = 302.44$ , df= 11, |         |    |         |         |    |         |         |    |         |         |    |      |  |  |      |  |  |       |  |  |      |  |  |      |  |  |       |  |  |
| Parents are together <sup>Ref</sup>                                          |         |         |    | p <.001                     |         |    |         |         |    |         |         |    |         |         |    |      |  |  |      |  |  |       |  |  |      |  |  |      |  |  |       |  |  |
| Single parent                                                                |         |         |    | Classification accuracy     |         |    |         |         |    |         |         |    |         |         |    |      |  |  |      |  |  |       |  |  |      |  |  |      |  |  |       |  |  |
| Father/mother remarried                                                      |         |         |    | =75.3                       |         |    |         |         |    |         |         |    |         |         |    |      |  |  |      |  |  |       |  |  |      |  |  |      |  |  |       |  |  |
| Foster                                                                       |         |         |    | AIC = 2705.78               |         |    |         |         |    |         |         |    |         |         |    |      |  |  |      |  |  |       |  |  |      |  |  |      |  |  |       |  |  |
| Family circumstance:<br>Expressed emotion in<br>family<br>(Ref=below median) |         |         |    |                             |         |    |         |         |    |         |         |    |         |         |    |      |  |  |      |  |  |       |  |  |      |  |  |      |  |  |       |  |  |
|                                                                              |         |         |    |                             |         |    | .100    |         |    | .000    |         |    | 2.228   |         |    | .101 |  |  | .000 |  |  | 2.175 |  |  | .101 |  |  | .000 |  |  | 2.178 |  |  |
| <hr/>                                                                        |         |         |    |                             |         |    |         |         |    |         |         |    |         |         |    |      |  |  |      |  |  |       |  |  |      |  |  |      |  |  |       |  |  |
| <i>Education Program</i>                                                     |         |         |    | -2LL = 2620.01              |         |    |         |         |    |         |         |    |         |         |    |      |  |  |      |  |  |       |  |  |      |  |  |      |  |  |       |  |  |
| High school <sup>Ref</sup>                                                   |         |         |    | $\chi^2 = 372.21$ , df= 15, |         |    |         |         |    |         |         |    |         |         |    |      |  |  |      |  |  |       |  |  |      |  |  |      |  |  |       |  |  |
| Vocational school                                                            |         |         |    | p <.001                     |         |    |         |         |    |         |         |    |         |         |    |      |  |  |      |  |  |       |  |  |      |  |  |      |  |  |       |  |  |
| <i>Location of school</i>                                                    |         |         |    | Classification accuracy     |         |    |         |         |    |         |         |    |         |         |    |      |  |  |      |  |  |       |  |  |      |  |  |      |  |  |       |  |  |
| Sub-urban <sup>Ref</sup>                                                     |         |         |    | =75.5                       |         |    |         |         |    |         |         |    |         |         |    |      |  |  |      |  |  |       |  |  |      |  |  |      |  |  |       |  |  |
| Urban                                                                        |         |         |    | AIC = 2640.01               |         |    |         |         |    |         |         |    |         |         |    |      |  |  |      |  |  |       |  |  |      |  |  |      |  |  |       |  |  |
| Bangkok                                                                      |         |         |    |                             |         |    | .118    |         |    | .058    |         |    | 1.250   |         |    | .153 |  |  | .856 |  |  | 1.028 |  |  |      |  |  |      |  |  |       |  |  |
|                                                                              |         |         |    |                             |         |    | .138    |         |    | .001    |         |    | 1.566   |         |    | .195 |  |  | .396 |  |  | 1.180 |  |  |      |  |  |      |  |  |       |  |  |
| <hr/>                                                                        |         |         |    |                             |         |    |         |         |    |         |         |    |         |         |    |      |  |  |      |  |  |       |  |  |      |  |  |      |  |  |       |  |  |
| <i>Location of school*</i>                                                   |         |         |    | -2LL = 2601.24              |         |    |         |         |    |         |         |    |         |         |    |      |  |  |      |  |  |       |  |  |      |  |  |      |  |  |       |  |  |
| <i>Education Program</i>                                                     |         |         |    | $\chi^2 = 390.98$ , df= 18, |         |    |         |         |    |         |         |    |         |         |    |      |  |  |      |  |  |       |  |  |      |  |  |      |  |  |       |  |  |
| Sub-urban*High school <sup>Ref</sup>                                         |         |         |    | p <.001                     |         |    |         |         |    |         |         |    |         |         |    |      |  |  |      |  |  |       |  |  |      |  |  |      |  |  |       |  |  |
| Urban* Vocational school                                                     |         |         |    | Classification accuracy     |         |    |         |         |    |         |         |    |         |         |    |      |  |  |      |  |  |       |  |  |      |  |  |      |  |  |       |  |  |
| Bangkok* Vocational sc.                                                      |         |         |    | =77                         |         |    |         |         |    |         |         |    |         |         |    |      |  |  |      |  |  |       |  |  |      |  |  |      |  |  |       |  |  |
|                                                                              |         |         |    |                             |         |    | .247    |         |    | .023    |         |    | 1.756   |         |    | .282 |  |  | .013 |  |  | 2.009 |  |  |      |  |  |      |  |  |       |  |  |
| <hr/>                                                                        |         |         |    |                             |         |    |         |         |    |         |         |    |         |         |    |      |  |  |      |  |  |       |  |  |      |  |  |      |  |  |       |  |  |
|                                                                              |         |         |    | -2LL = 2593.7               |         |    |         |         |    |         |         |    |         |         |    |      |  |  |      |  |  |       |  |  |      |  |  |      |  |  |       |  |  |
|                                                                              |         |         |    | $\chi^2 = 398.53$ , df= 20, |         |    |         |         |    |         |         |    |         |         |    |      |  |  |      |  |  |       |  |  |      |  |  |      |  |  |       |  |  |
|                                                                              |         |         |    | p <.001                     |         |    |         |         |    |         |         |    |         |         |    |      |  |  |      |  |  |       |  |  |      |  |  |      |  |  |       |  |  |
|                                                                              |         |         |    | Classification accuracy     |         |    |         |         |    |         |         |    |         |         |    |      |  |  |      |  |  |       |  |  |      |  |  |      |  |  |       |  |  |
|                                                                              |         |         |    | =76.7                       |         |    |         |         |    |         |         |    |         |         |    |      |  |  |      |  |  |       |  |  |      |  |  |      |  |  |       |  |  |
|                                                                              |         |         |    | AIC = 2619.7                |         |    |         |         |    |         |         |    |         |         |    |      |  |  |      |  |  |       |  |  |      |  |  |      |  |  |       |  |  |
